# Supplementary material for: Reduction of Outdoor and Indoor PM2.5 Source Contributions via Portable Air Filtration Systems in a Senior Residential Facility in Detroit, Michigan
Source: MDPI journal article supplement (doi:10.3390/toxics11121019), 2023-12-14
Supplement: s1 [file s1]

**Supplemental Materials:****Table S1.** Outdoor and indoor base error estimations from creating factor profiles resolved from the positive matrix factorization analysis.

| Outdoor BS Mapping: |                               |                       |         |                    |                         |          |
|---------------------|-------------------------------|-----------------------|---------|--------------------|-------------------------|----------|
|                     | Sewage/Municipal Incineration | Iron/Steel Industries | Traffic | Secondary Aerosols | Oil Combustion Refinery | Unmapped |
| Boot Factor 1       | 96                            | 2                     | 1       | 1                  | 0                       | 0        |
| Boot Factor 2       | 0                             | 100                   | 0       | 0                  | 0                       | 0        |
| Boot Factor 3       | 0                             | 0                     | 100     | 0                  | 0                       | 0        |
| Boot Factor 4       | 0                             | 0                     | 0       | 100                | 0                       | 0        |
| Boot Factor 5       | 0                             | 0                     | 0       | 0                  | 100                     | 0        |

| Indoor BS Mapping: |                                  |         |         |                   |                    |          |
|--------------------|----------------------------------|---------|---------|-------------------|--------------------|----------|
|                    | Iron/Steel Industries/Urban Dust | Smoking | Traffic | Organic Compounds | Secondary Aerosols | Unmapped |
| Boot Factor 1      | 98                               | 0       | 0       | 0                 | 0                  | 2        |
| Boot Factor 2      | 0                                | 98      | 0       | 0                 | 0                  | 2        |
| Boot Factor 3      | 0                                | 0       | 95      | 0                 | 3                  | 2        |
| Boot Factor 4      | 1                                | 3       | 0       | 93                | 1                  | 2        |
| Boot Factor 5      | 0                                | 5       | 0       | 0                 | 93                 | 2        |
